# Supplementary material for: Tandem templating strategies facilitate the assembly of calix[8]arene-supported Ln18 clusters
Source: Royal Society of Chemistry journal article supplement (doi:10.1039/d4dt00280f), 2024-01-01
Supplement: d4dt00280f1.pdf [file d4dt00280f1.pdf]

## ***Electronic Supporting Information***

### **Tandem templating strategies facilitate the assembly of calix[8]arene-supported Ln<sub>18</sub> clusters**

Yushu Jiao,<sup>a</sup> Sergio Sanz,<sup>\*b</sup> Jan van Leusen,<sup>a</sup> David Gracia,<sup>c</sup> Angelos B. Canaj,<sup>d</sup> Marco Evangelisti,<sup>\*c</sup> Euan K. Brechin,<sup>\*d</sup> Scott J. Dalgarno<sup>\*e</sup> and Paul Kögerler<sup>\*a,b</sup>

*a. Institute of Inorganic Chemistry, RWTH Aachen University, 52056 Aachen, Germany. E-mail: paul.koegerler@ac.rwth-aachen.de*

*b. Peter Grünberg Institute 6, Forschungszentrum Jülich, 52425 Jülich, Germany. E-mail: s.calvo@fz-juelich.de*

*c. Instituto de Nanociencia y Materiales de Aragón (INMA), CSIC – Universidad de Zaragoza, Departamento de Física de la Materia Condensada, 50009 Zaragoza, Spain. E-mail: evange@unizar.es*

*d. EaStCHEM School of Chemistry, The University of Edinburgh, David Brewster Road, Edinburgh, EH9 3FJ, UK. E-mail: ebrechin@ed.ac.uk*

*e. Institute of Chemical Sciences, Heriot-Watt University, Riccarton, Edinburgh, EH14 4AS, UK. E-mail: S.J.Dalgarno@hw.ac.uk*

## Contents

|                                                                                               |    |
|-----------------------------------------------------------------------------------------------|----|
| I. Instrumentation.....                                                                       | 2  |
| II. IR details of Ln <sub>2</sub> complexes.....                                              | 2  |
| III. Coordination geometry of La <sup>III</sup> ions in La <sup>III</sup> <sub>18</sub> ..... | 2  |
| IV. Additional SCXRD information .....                                                        | 3  |
| V. IR spectra.....                                                                            | 6  |
| VI. Powder X-ray diffraction .....                                                            | 7  |
| VII. UV-Vis spectroscopy.....                                                                 | 7  |
| VIII. Thermogravimetric analysis.....                                                         | 8  |
| IX. Magnetocaloric studies .....                                                              | 10 |

## I. Instrumentation

Infrared spectra were collected on a Bruker VERTEX 70 FT-IR spectrometer coupled with a RAM II FT-Raman module. UV–Vis spectra were measured on a Shimadzu UV–2600 spectrophotometer (10 mm quartz glass cuvettes for liquid-state samples) at room temperature. CHN Elemental Analyses were analyzed in an Elementar VarioEL. Powder X-ray diffraction data were collected on a STADI P powder diffractometer from STOE using a Cu-K $\alpha$  radiation ( $\lambda = 1.54059 \text{ \AA}$ ) and a focusing Ge monochromator (Johann-type) at room temperature. Thermogravimetric thermal analyses were performed on a Mettler Toledo SDTA 851 under air at a heating rate of  $1 \text{ K min}^{-1}$ .

## II. IR details of Ln<sub>2</sub> complexes

### La<sub>2</sub>

IR ( $\tilde{\nu} / \text{cm}^{-1}$ ): 2957 (m), 2907 (w), 2866 (w), 1635 (w), 1480 (vs), 1391 (m), 1360 (m), 1298 (s), 1261 (w), 1205 (w), 1122 (w), 1099 (w), 1022 (m), 962 (s), 908 (w), 870 (w), 819 (vs), 748 (w), 649 (m), 566 (w), 528 (w).

### Nd<sub>2</sub>

IR ( $\tilde{\nu} / \text{cm}^{-1}$ ): 2957 (m), 2907 (w), 2866 (w), 1635 (w), 1480 (vs), 1391 (m), 1360 (m), 1298 (s), 1261 (w), 1205 (w), 1122 (w), 1099 (w), 1022 (m), 962 (s), 908 (w), 870 (w), 819 (vs), 748 (w), 649 (m), 566 (w), 528 (w).

### Gd<sub>2</sub>

IR ( $\tilde{\nu} / \text{cm}^{-1}$ ): 2953 (m), 2907 (w), 2865 (w), 1603 (w), 1483 (vs), 1391 (m), 1360 (m), 1296 (w), 1207 (w), 1124 (w), 1020 (m), 961 (s), 911 (w), 870 (w), 821 (vs), 750 (w), 667 (m), 528 (w).

## III. Coordination geometry of La<sup>III</sup> ions in La<sup>III</sup><sub>18</sub>

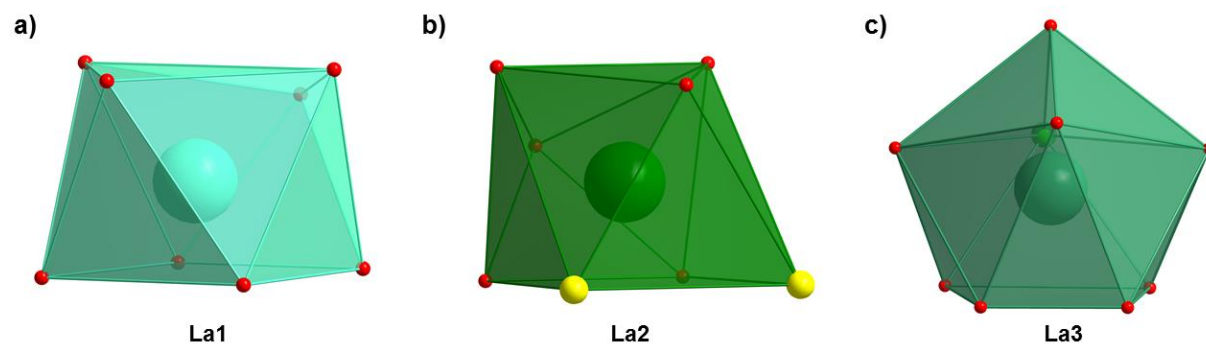

**Fig. S1.** a) Distorted square antiprismatic Ln<sup>III</sup>O<sub>8</sub> geometry in La1 ions. b) Distorted square antiprismatic Ln<sup>III</sup>O<sub>6</sub>Cl<sub>2</sub> geometry in La2 ions. c) Distorted capped square antiprismatic Ln<sup>III</sup>O<sub>8</sub>Cl geometry in La3 ions. Colour code: La1 = cyan, La2 = green, La3 = pale green, O = red, and Cl = yellow.

#### IV. Additional SCXRD information

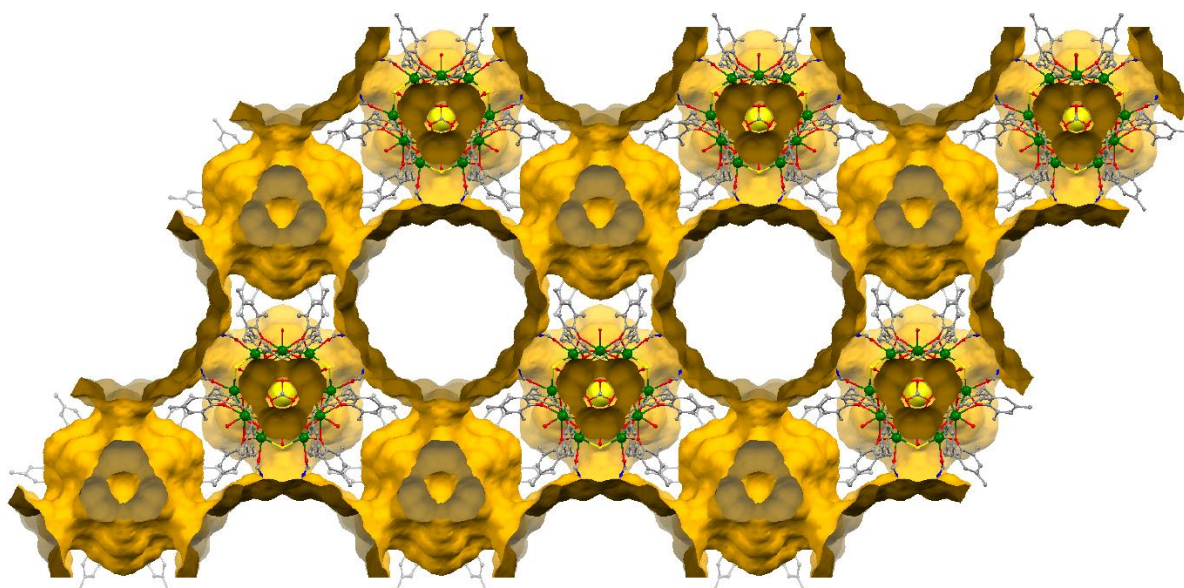

**Fig. S2.** Crystal packing of **1** view along the *c* axis. The empty space calculation by using the void calculation tool in Mercury 2022.3 for a spherical probe radius of 1.5 Å and a grid spacing of 0.3 Å accounts for ~50% of its volume. The available space is represented in white color.

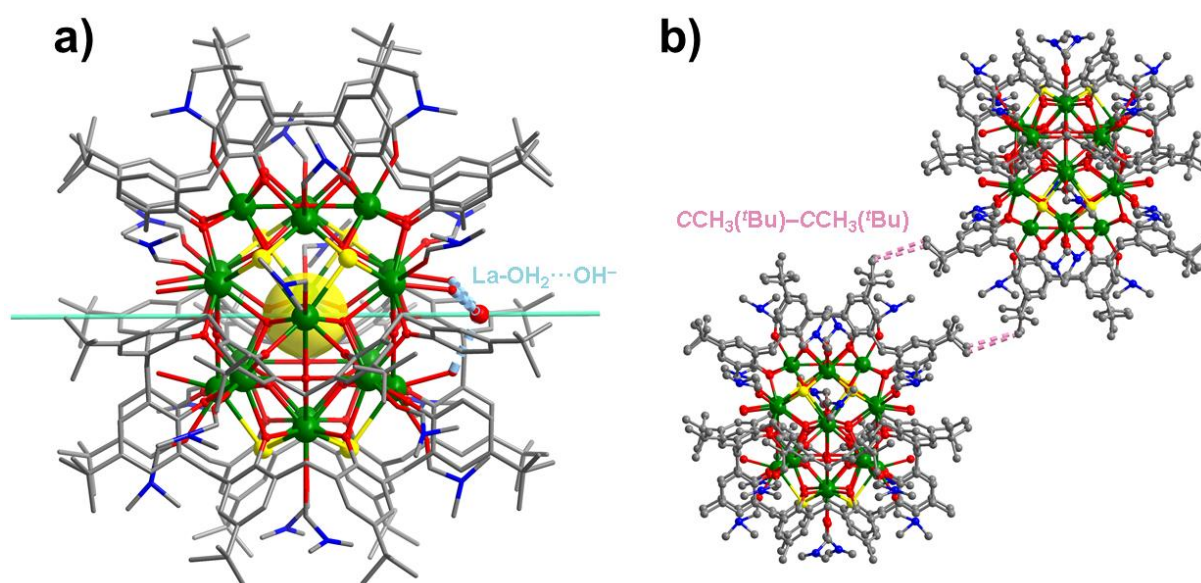

**Fig. S3.** a) Molecular structure of  $[\text{La}^{\text{III}}_{18}(\text{TBC}[8]-8\text{H})_3(\mu_4\text{-O})_3(\mu_3\text{-Cl})_6(\mu_3\text{-OH})_{12}(\mu_3\text{-CO}_3)_2(\text{H}_2\text{O})_6(\text{DMF})_{18}\text{Cl}]\text{OH}\cdot\text{H}_2\text{O}\cdot 12\text{DMF}$  with the  $C_3$  axis passing through the two central carbon atoms of the two carbonate ligands, the central  $\text{Cl}^-$  anion, and the  $\text{OH}^-$  counteranion, showing the hydrogen bonding interaction of  $\text{La-OH}_2\cdots\text{OH}^-$  at 2.599 Å distance. b) The intermolecular  $\text{CCH}_3(\text{'Bu})-\text{CCH}_3(\text{'Bu})$  interactions between neighboring molecules. Color code: La: green, O: red, Cl: yellow, N: blue, and C: gray.

**Table S1.** Crystallographic data and structure refinement details for **1**.

| Compound                                                                    | <b>1</b>                                                                                           |
|-----------------------------------------------------------------------------|----------------------------------------------------------------------------------------------------|
| CCDC                                                                        | 2299004                                                                                            |
| Radiation type                                                              | Cu K $\alpha$                                                                                      |
| Empirical formula                                                           | C <sub>356</sub> H <sub>549</sub> Cl <sub>7</sub> La <sub>18</sub> N <sub>30</sub> O <sub>83</sub> |
| Formula weight / g mol <sup>-1</sup>                                        | 9325.75                                                                                            |
| Crystal system                                                              | Trigonal                                                                                           |
| Space group                                                                 | <i>P</i> -31 <i>c</i>                                                                              |
| <i>a</i> / Å                                                                | 32.5846(4)                                                                                         |
| <i>b</i> / Å                                                                | 32.5846(4)                                                                                         |
| <i>c</i> / Å                                                                | 34.4461(6)                                                                                         |
| $\alpha$                                                                    | 90°                                                                                                |
| $\beta$                                                                     | 90°                                                                                                |
| $\gamma$                                                                    | 120°                                                                                               |
| Volume / Å <sup>3</sup>                                                     | 31673.5(10)                                                                                        |
| <i>Z</i>                                                                    | 2                                                                                                  |
| <i>D</i> <sub>calc</sub> / g cm <sup>-3</sup>                               | 0.978                                                                                              |
| Absorption coefficient / mm <sup>-1</sup>                                   | 9.799                                                                                              |
| <i>F</i> (000)                                                              | 9408                                                                                               |
| Crystal size / mm <sup>3</sup>                                              | 0.4×0.24×0.08                                                                                      |
| Theta range for data collection                                             | 6.264–130.688°                                                                                     |
| Completeness to $\theta_{\max}$                                             | 99.7 %                                                                                             |
| Index ranges                                                                | –37 ≤ <i>h</i> ≤ 38,<br>–38 ≤ <i>k</i> ≤ 37,<br>–40 ≤ <i>l</i> ≤ 40                                |
| Reflections collected                                                       | 458160                                                                                             |
| Independent reflections                                                     | 18091                                                                                              |
| <i>R</i> <sub>int</sub>                                                     | 0.1166                                                                                             |
| Observed ( <i>I</i> > 2σ( <i>I</i> ))                                       | 8437                                                                                               |
| Absorption correction                                                       | Multi-scan                                                                                         |
| <i>T</i> <sub>min</sub> / <i>T</i> <sub>max</sub>                           | 0.3649/0.7516                                                                                      |
| Data/restraints/parameters                                                  | 18091/470/852                                                                                      |
| Goodness-of-fit on <i>F</i> <sup>2</sup>                                    | 1.103                                                                                              |
| <i>R</i> <sub>1</sub> , <i>wR</i> <sub>2</sub> ( <i>I</i> > 2σ( <i>I</i> )) | <i>R</i> <sub>1</sub> = 0.0832,<br><i>wR</i> <sub>2</sub> = 0.2445                                 |
| <i>R</i> <sub>1</sub> , <i>wR</i> <sub>2</sub> (all data)                   | <i>R</i> <sub>1</sub> = 0.1262,<br><i>wR</i> <sub>2</sub> = 0.3071                                 |
| Largest diff. peak and hole / e Å <sup>-3</sup>                             | 1.05 / –1.12                                                                                       |

**Table S2.** Unit cell parameters for **2** and **3**.

| Compound                                  | <b>2</b>                                                                                             | <b>3</b>                                                                                               |
|-------------------------------------------|------------------------------------------------------------------------------------------------------|--------------------------------------------------------------------------------------------------------|
| Radiation type                            | Cu K $\alpha$                                                                                        | Cu K $\alpha$                                                                                          |
| Empirical formula                         | C <sub>320</sub> H <sub>465</sub> Cl <sub>7</sub> Nd <sub>18</sub> N <sub>1</sub><br>O <sub>71</sub> | C <sub>320</sub> H <sub>465</sub> Cl <sub>7</sub> Gd <sub>18</sub> N <sub>18</sub> O <sub>7</sub><br>1 |
| Molecular weight /<br>g mol <sup>-1</sup> | 8544.80                                                                                              | 8778.95                                                                                                |
| Crystal system                            | Trigonal                                                                                             | Trigonal                                                                                               |
| Space group                               | <i>P</i> -31c                                                                                        | <i>P</i> -31c                                                                                          |
| <i>a</i> / Å                              | 32.306(0)                                                                                            | 32.599(2)                                                                                              |
| <i>b</i> / Å                              | 32.306(0)                                                                                            | 32.599(2)                                                                                              |
| <i>c</i> / Å                              | 34.250(4)                                                                                            | 33.717(3)                                                                                              |
| $\alpha$                                  | 90°                                                                                                  | 90°                                                                                                    |
| $\beta$                                   | 90°                                                                                                  | 90°                                                                                                    |
| $\gamma$                                  | 120°                                                                                                 | 120°                                                                                                   |
| Volume / Å <sup>3</sup>                   | 30957.3(1)                                                                                           | 31030.5(0)                                                                                             |
| Z                                         | 2                                                                                                    | 2                                                                                                      |
| Crystal size / mm <sup>3</sup>            | 0.07×0.07×0.27                                                                                       | 0.05×0.05×0.16                                                                                         |

**Table S3.** Selected bond lengths in **1**.

| Bond Type                     | Bond Length / Å |
|-------------------------------|-----------------|
| La1- $\mu_2$ -O (TBC[8])      | 2.421–2.598     |
| La1- $\mu_4$ -O               | 2.553           |
| La1- $\mu_3$ -OH              | 2.546 and 2.553 |
| La1-O <sub>DMF</sub>          | 2.407           |
| La2- $\mu_2$ -O (TBC[8])      | 2.404 and 2.405 |
| La2- $\mu_4$ -O               | 2.827           |
| La2- $\mu_3$ -OH              | 2.432 and 2.440 |
| La2-O <sub>DMF</sub>          | 2.419           |
| La2- $\mu_3$ -Cl              | 2.974           |
| La3- $\mu_2$ -O (TBC[8])      | 2.491 and 2.509 |
| La3- $\mu_3$ -OH              | 2.574 and 2.590 |
| La3- $\mu_3$ -CO <sub>3</sub> | 2.620 and 2.622 |
| La3-O <sub>DMF</sub>          | 2.500           |
| La3-O <sub>H2O</sub>          | 2.541           |
| La3- $\mu_3$ -Cl              | 3.060           |

**Table S4.** Bond valence sum values for different atoms of **1**.

| Atoms                                | BVS value |
|--------------------------------------|-----------|
| La1                                  | 3.15      |
| La2                                  | 3.20      |
| La3                                  | 3.08      |
| <b><math>\mu_2</math>-O (TBC[8])</b> |           |
| O1                                   | -2.18     |
| O2                                   | -2.18     |
| O3                                   | -2.19     |
| O4                                   | -2.03     |
| <b><math>\mu_3</math>-OH</b>         |           |
| O7                                   | -1.16     |
| O13                                  | -1.14     |
| <b><math>\mu_3</math>-Cl</b>         |           |
| Cl10                                 | -1.01     |

#### V. IR spectra

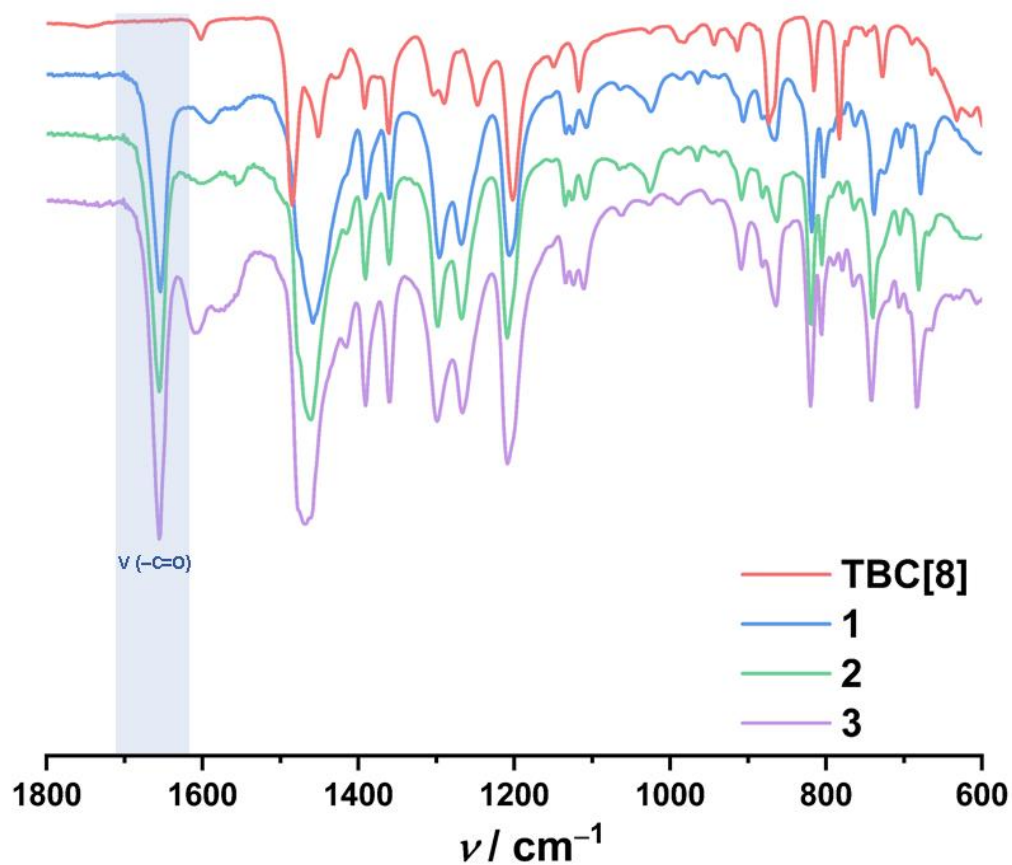

**Fig. S4.** IR spectra of TBC[8] (red line) and complexes 1–3 (1: blue; 2: green; 3: purple line).

## VI. Powder X-ray diffraction

PXRD experiments of **1–3** were carried out at room temperature. Differences in the PXRD of samples **1–3** may be produced by the loss of crystallization solvent when crystals are collected from the mother liquor. Lower quality of the crystals results in a worsening of the experimental PXRD. Their lattice size variations at different temperatures contribute to the reflex position shifts between the experimental and theoretical curves, given that PXRD diffraction was performed at room temperature, while SXRD diffraction was performed at 100 K. The difference in the reflex intensity observed between the experimental and theoretical patterns could be attributed to the random orientation of the crystallites in the samples.

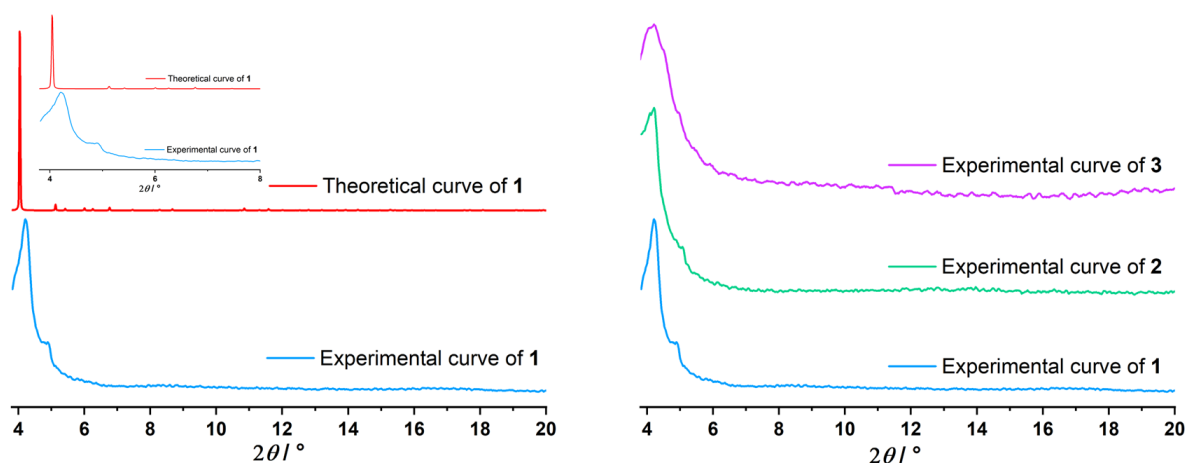

**Fig. S5.** Experimental and calculated (red line) PXRD patterns in the angles of 4–30° for **1** (blue), **2** (green), and **3** (purple line).

## VII. UV-Vis spectroscopy

The liquid UV-Vis spectra (Fig. S6) of **1–3** in  $\text{CHCl}_3$  solutions display similar characteristic bands. In the range of 800 – 250 nm, an absorption band can be observed at  $\epsilon = 2.27 \times 10^5$  (305 nm)  $\text{M}^{-1} \text{cm}^{-1}$  for **1**; at  $2.16 \times 10^5$  (304 nm)  $\text{M}^{-1} \text{cm}^{-1}$  for **2**, and at  $2.53 \times 10^5$  (304 nm)  $\text{M}^{-1} \text{cm}^{-1}$  for **3**. These bands correspond to typical  $\pi\text{-}\pi^*$  electronic transitions centered on the aromatic rings. Note that the UV-Vis curves of **3** are almost unchanged over a 24-hour period, indicating that these complexes do not decompose over the course of the measurements.



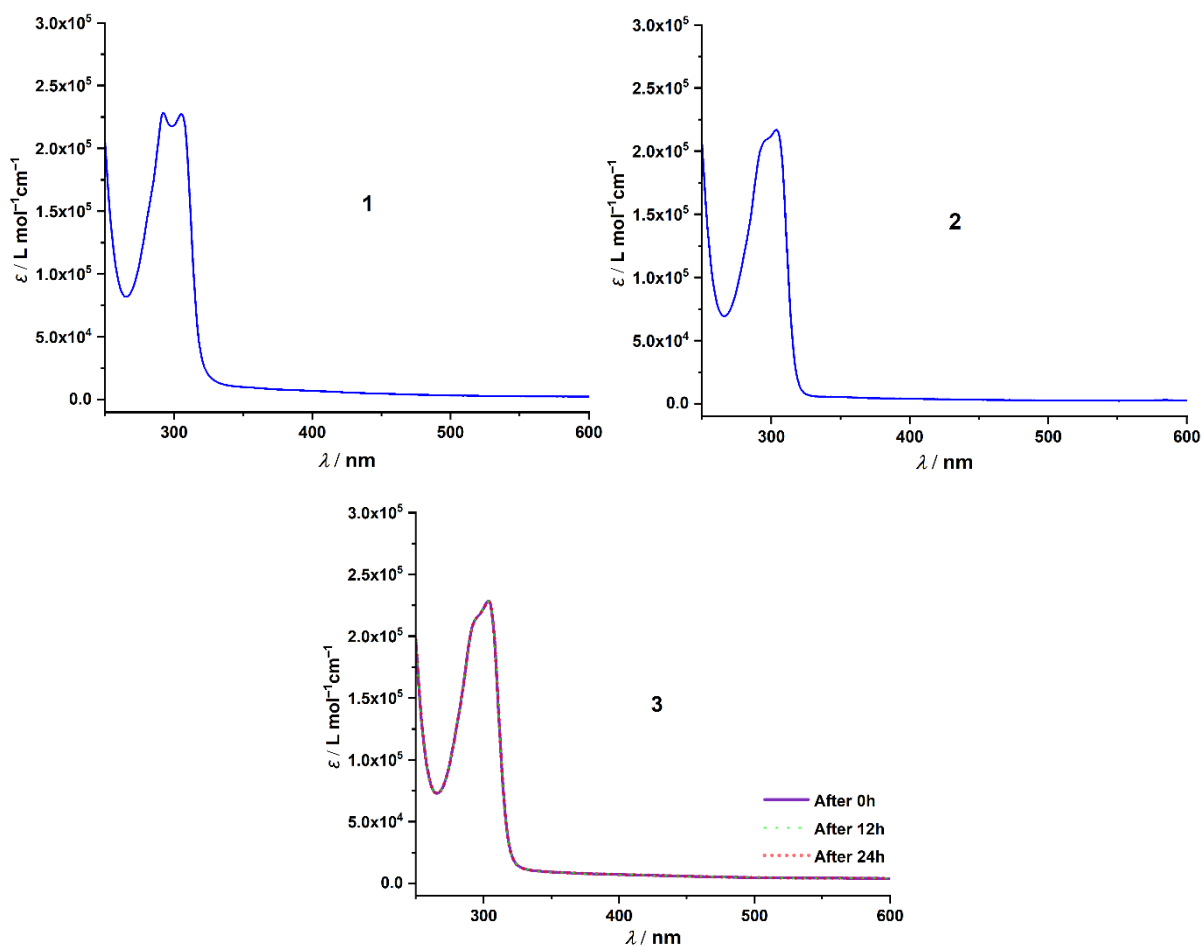

Fig. S6. UV-Vis spectra of **1–3** in  $\text{CHCl}_3$  solutions.

### VIII. Thermogravimetric analysis

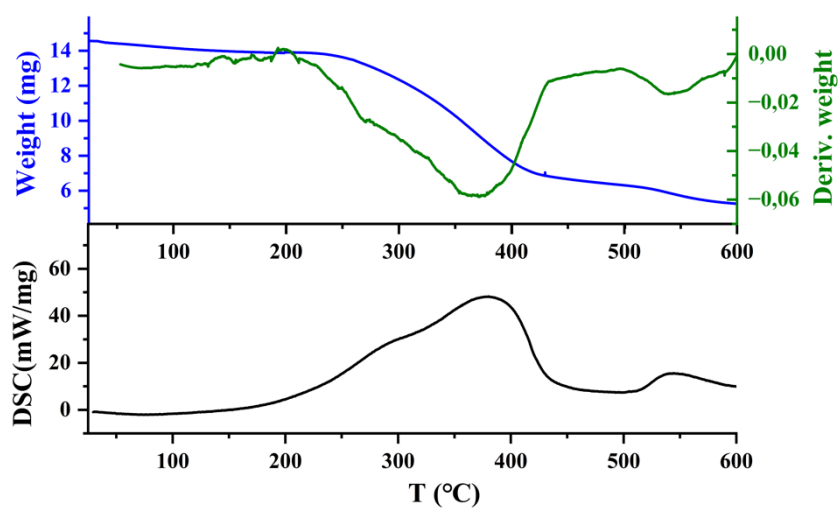

Fig. S7. TGA (blue line), weight derivative (green line), and DSC (black line) curves of **1**.

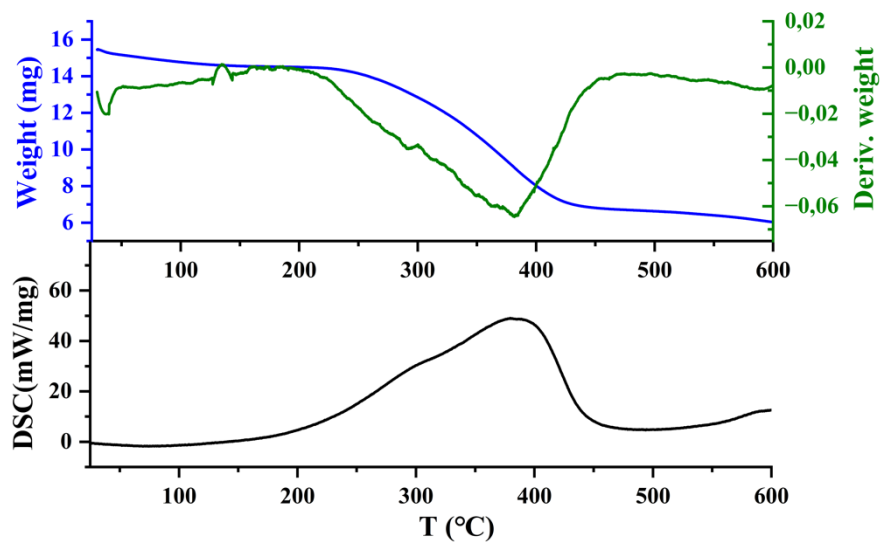

**Fig. S8.** TGA (blue line), weight derivative (green line), and DSC (black line) curves of **2**.

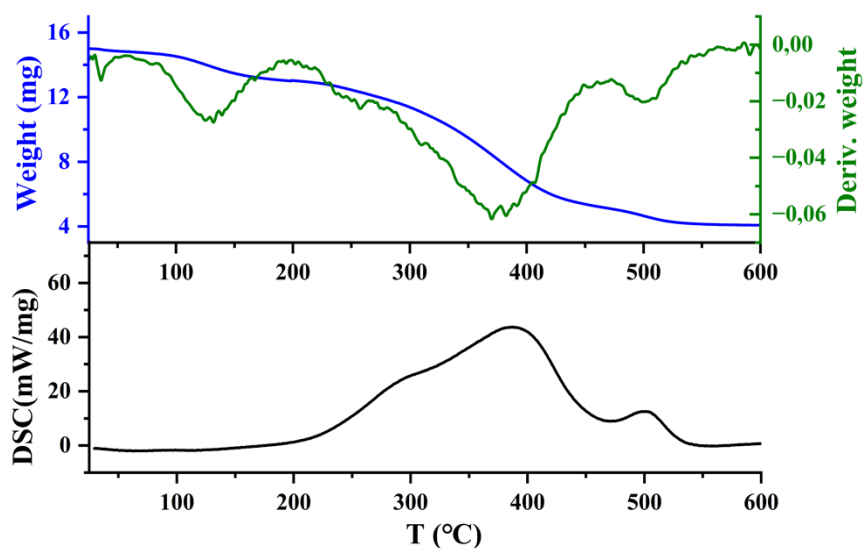

**Fig. S9.** TGA (blue line), weight derivative (green line), and DSC (black line) curves of **3**.

## IX. Magnetocaloric studies

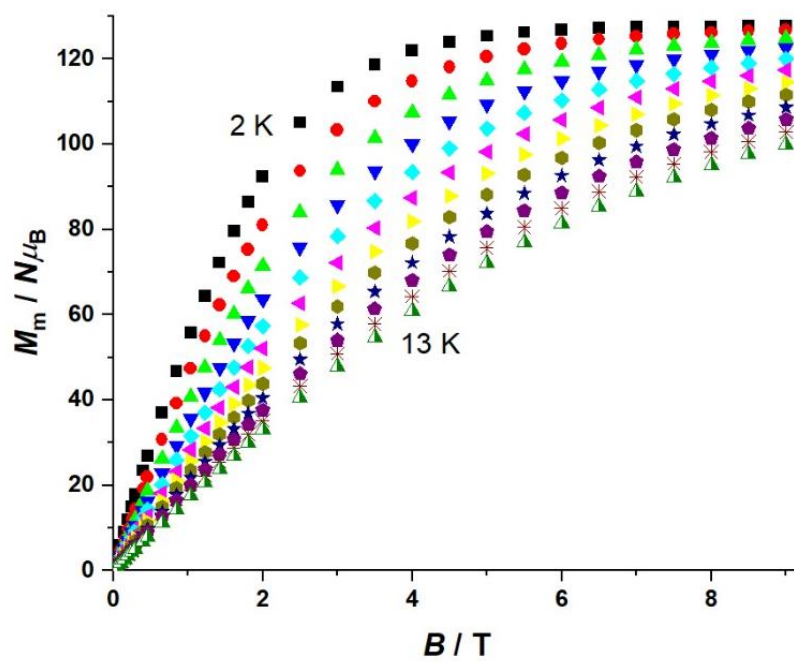

**Fig. S10.** Molar magnetization ( $M_m$ ) vs. applied magnetic field ( $B$ ) between 2 and 13 K, for **3**.

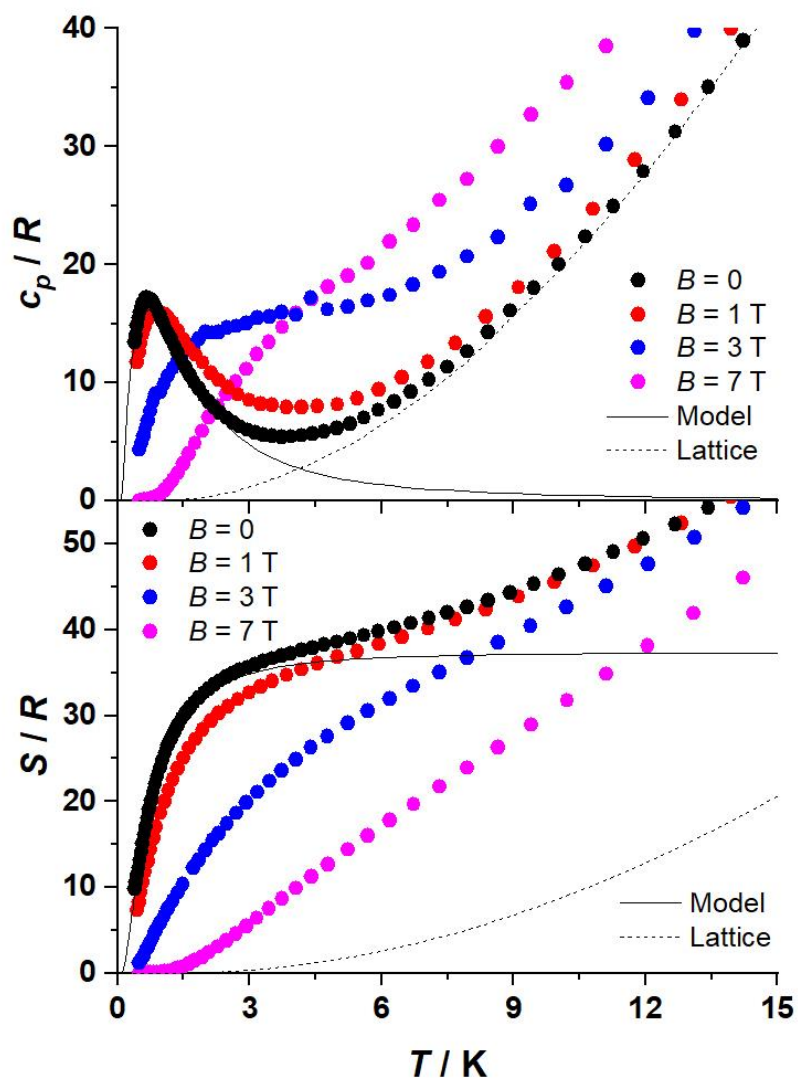

**Fig. S11.** Heat capacity ( $c_p$ , top) and entropy ( $S$ , bottom), normalized to the gas constant  $R$ , for **3** for selected applied field values, as labelled. The zero-field magnetic contributions to  $c_p$  and  $S$  are well described by the Schottky model for an effective field  $B_{\text{eff}} = 0.6$  T (solid lines). The lattice contributions to  $c_p$  and  $S$  (dashed lines) are well accounted for by the Debye heat capacity, which simplifies to  $c_{\text{latt}}/R = 4.1 \times 10^{-2} T^3$  at the lowest temperatures.
